# Supplementary material for: Deciphering Cell-Type-Specific Gene Expression Signatures of Cardiac Diseases Through Reconstruction of Bulk Transcriptomes
Source: Front Cell Dev Biol. 2022 Feb 18;10:792774. doi: 10.3389/fcell.2022.792774 (PMC8894713; doi:10.3389/fcell.2022.792774)
Supplement: Supplementary file 4 [file Table1.XLSX]

## Sheet: Sheet1
Statistics of the bulk RNA-seq input samples used in transcriptome reconstruction.
GEO accession	Disease condition	Sample size
GSE138008	MI	6
GSE138201	MI	7
GSE69201	MI	6
GSE75213	HCM	6
GSE96561	HCM	12
GSE101977	HCM	24
GSE110209	MI	6
GSE112055	HCM	10
GSE121546	HCM	6
GSE129134	MI	8
GSE101301	ARVC	6
GSE106201	DCM	13
